# Supplementary material for: Assessment of Psyllid Handling and DNA Extraction Methods in the Detection of ‘Candidatus Liberibacter Solanacearum’ by qPCR
Source: MDPI journal article supplement (doi:10.3390/microorganisms10061104), 2022-05-26
Supplement: s1 [file s1]

**Table S1.** References, sequences and amplification conditions of the PCR and qPCR protocols used in the present study.

| R *  | PCR ** | Protocol |                                          | Conditions *** |        |      |
|------|--------|----------|------------------------------------------|----------------|--------|------|
|      |        | Name     | Sequences (5'-3')                        | Cycles         | T (°C) | Time |
| [58] | C      | LsoTX    | AATTTTAGCAAGTTCTAAGGG                    | 1              | 98     | 30 s |
|      |        | 16/23F   |                                          | 35             | 98     | 10 s |
|      |        | LsoTX    | 62                                       |                | 20 s   |      |
|      |        | 16/23R   | 72                                       |                | 30 s   |      |
|      |        |          | 72                                       |                | 7 min  |      |
| [51] | Q      | CaLsppF  | GCAG GCCTAACACATGCAAGT                   | 1              | 95     | 10   |
|      |        | CaLsppR  | GCAC ACGTTTCCATGCGTTAT                   | 45             | 95     | 15 s |
|      |        | CaLsolP  | FAM-AGCGCTTATTTTAAATAGGAGCGGCAGACG-TAMRA |                | 60     | 60s  |
| [7]  | Q      | LsoF     | GTC GAG CGC TTA TTTTAA ATA GGA           | 1              | 95     | 20 s |
|      |        | HLBr     | GCGTTATCCCGTAGAAAAAGGTAG                 | 40             | 95     | 1s   |
|      |        | HLBp     | FAM-AGACGGGTGAGTAACGCG-BHQ-1             |                | 58     | 40s  |

\* R: References.

\*\* C: conventional PCR protocol; Q: quantitative PCR protocol.

\*\*\* Amplification conditions by conventional PCR and qPCR.
